# Supplementary figures and images for: A 30-Year Review on Nanocomposites: Comprehensive Bibliometric Insights into Microstructural, Electrical, and Mechanical Properties Assisted by Artificial Intelligence
Source: MDPI journal article supplement (doi:10.3390/ma17051088), 2024-02-27

# Structure of the Methods

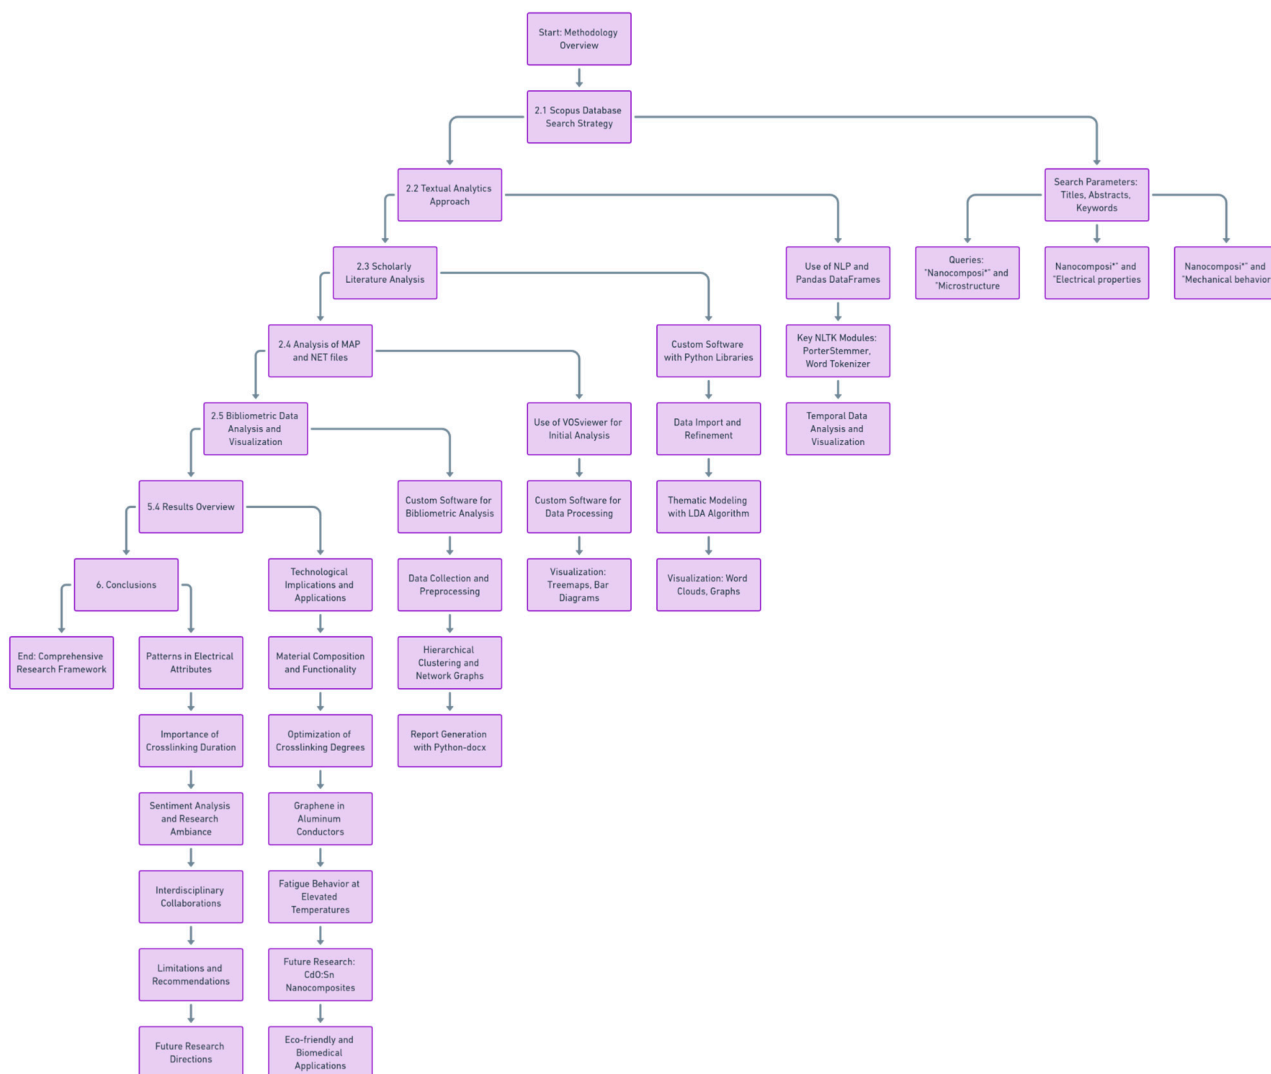

Made with  Whimsical

Figure S1. Methods and results.

Supplement: s1 [file s1]
